# Supplementary material
Source: publisher figshare collection journal article supplement (https://geolsoc.figshare.com/articles/dataset/_/3453086)
Supplement: Supplementary file 4 [file 1]

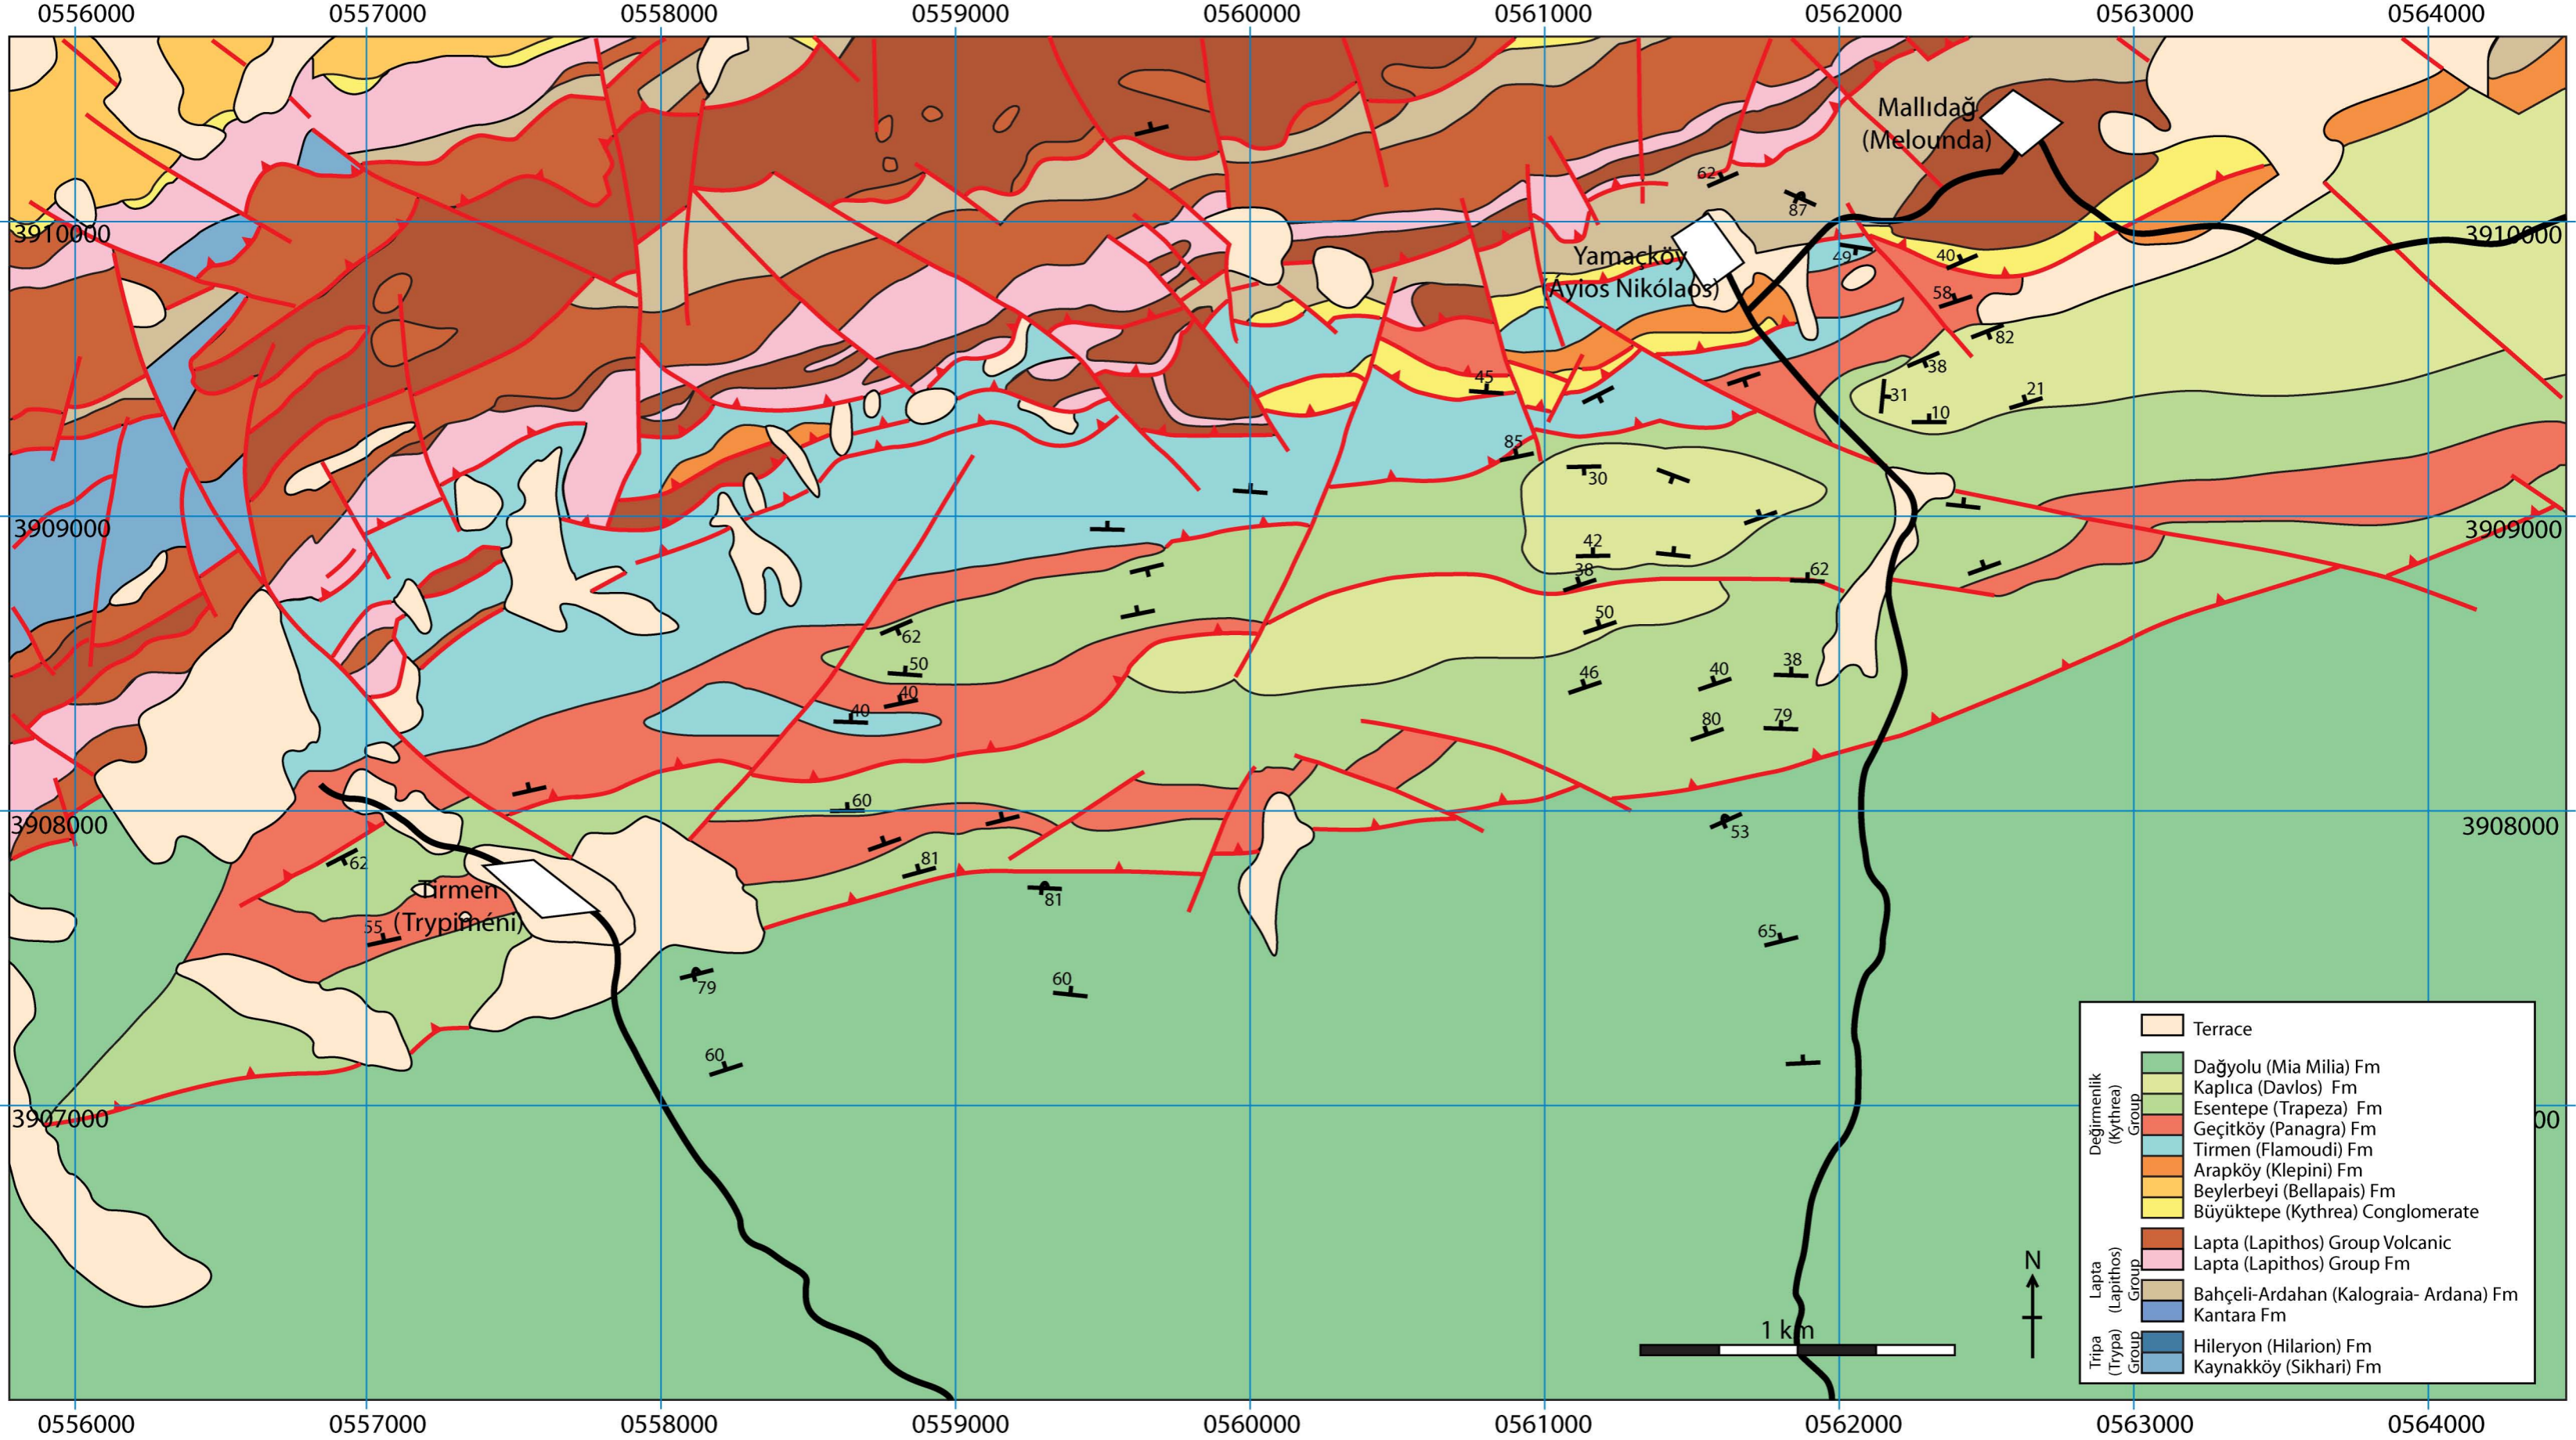

|                                   |                                        |
|-----------------------------------|----------------------------------------|
|                                   | Terrace                                |
| Değirmenlik<br>(Kythrea)<br>Group | Dağyolu (Mia Milia) Fm                 |
|                                   | Kaplıca (Davlos) Fm                    |
|                                   | Esentepe (Trapeza) Fm                  |
|                                   | Geçitköy (Panagra) Fm                  |
|                                   | Tirmen (Flamoudi) Fm                   |
|                                   | Arapköy (Klepini) Fm                   |
|                                   | Beylerbeyi (Bellapais) Fm              |
| Büyüktepe (Kythrea) Conglomerate  |                                        |
| Lapta<br>(Lapithos)<br>Group      | Lapta (Lapithos) Group Volcanic        |
|                                   | Lapta (Lapithos) Group Fm              |
|                                   | Bahçeli-Ardahan (Kalograia- Ardana) Fm |
|                                   | Kantara Fm                             |
| Tripa<br>(Trypa)<br>Group         | Hileryon (Hilarion) Fm                 |
|                                   | Kaynakköy (Sikhari) Fm                 |
